# Supplementary material for: Diet–Cognition Associations Differ in Mild Cognitive Impairment Subtypes
Source: MDPI journal article supplement (doi:10.3390/nu13041341), 2021-04-17
Supplement: s1 [file s1]

Table S1. Food grouping used in the dietary consumption analysis

| Food group      | Detailed food items                                                                                                                              |
|-----------------|--------------------------------------------------------------------------------------------------------------------------------------------------|
| Rice            | Cooked white rice, cooked rice with assorted mixtures, rice-noodle                                                                               |
| Wheat           | Non-fried noodles (bread, steamed buns, noodles, dumplings)                                                                                      |
| Tuber           | Sweet potato, potato, taro                                                                                                                       |
| Legume          | Soybeans, mung beans, red beans, soy milk, soy flour, tofu                                                                                       |
| Fresh vegetable | Fresh legume vegetables, tomatoes, peppers, melon vegetables, green leafy vegetables, cabbage and other leafy vegetables, cruciferous vegetables |
| Fresh fruit     | Orange fruits, melon fruits, berry fruits, all other fresh fruits                                                                                |
| Pork            | Lean pork, fatty pork                                                                                                                            |
| Beef or mutton  | Beef, lamb, mutton                                                                                                                               |
| Poultry         | Chicken, duck, goose, pigeon, quail                                                                                                              |
| Fish            | Sea fish, freshwater fish                                                                                                                        |
| Egg             | Fresh egg, salted egg, preserved egg                                                                                                             |
| Dairy           | Liquid milk, milk powder, yogurt, cheese                                                                                                         |
| Nut             | Peanuts, melon seeds, pumpkin seeds, watermelon seeds                                                                                            |

Table S2. Characteristics and prevalence of MCI and its subtypes among Chinese adults aged 55 years and above in four provinces in CCSNSD 2018-2019<sup>a</sup>

| Characteristics                            | N (%)       | MCI <sup>b</sup> |      | P value | MCI subtypes <sup>b</sup> |          |         |          | P value |
|--------------------------------------------|-------------|------------------|------|---------|---------------------------|----------|---------|----------|---------|
|                                            |             | Yes              | No   |         | aMCI-SD                   | naMCI-SD | aMCI-MD | naMCI-MD |         |
| Total                                      | 4309(100.0) | 42.6             | 57.4 |         | 4.8                       | 6.9      | 8.2     | 6.0      |         |
| Age group (years)                          |             |                  |      | <0.001  |                           |          |         |          | <0.001  |
| 55-64                                      | 1586(36.8)  | 38.1             | 61.9 |         | 4.9                       | 6.6      | 5.2     | 3.7      |         |
| 65-74                                      | 1864(43.3)  | 42.0             | 58.0 |         | 4.8                       | 7.1      | 8.3     | 5.7      |         |
| ≥75                                        | 859(19.9)   | 51.9             | 48.1 |         | 4.4                       | 7.1      | 13.7    | 11.1     |         |
| Gender                                     |             |                  |      | 0.476   |                           |          |         |          | <0.001  |
| male                                       | 1956(45.4)  | 42.0             | 58.0 |         | 6.0                       | 7.4      | 6.6     | 4.1      |         |
| female                                     | 2353(54.6)  | 43.1             | 56.9 |         | 3.7                       | 6.5      | 9.6     | 7.6      |         |
| Resident area                              |             |                  |      | <0.001  |                           |          |         |          | <0.001  |
| urban                                      | 2130(49.4)  | 38.5             | 61.5 |         | 4.6                       | 6.2      | 5.0     | 5.2      |         |
| rural                                      | 2179(50.6)  | 46.5             | 53.5 |         | 4.9                       | 7.5      | 11.4    | 6.8      |         |
| Education level                            |             |                  |      | <0.001  |                           |          |         |          | <0.001  |
| illiteracy                                 | 613(14.2)   | 39.0             | 61.0 |         | 0.2                       | 1.0      | 23.3    | 14.5     |         |
| ≤Primary school                            | 1784(41.4)  | 38.6             | 61.4 |         | 4.7                       | 8.5      | 9.6     | 7.1      |         |
| ≥Secondary school                          | 1912(44.4)  | 47.4             | 52.6 |         | 6.3                       | 7.3      | 2.1     | 2.2      |         |
| Current employment                         |             |                  |      | 0.011   |                           |          |         |          | 0.165   |
| yes                                        | 772(17.9)   | 38.5             | 61.5 |         | 5.7                       | 5.6      | 7.3     | 5.1      |         |
| no                                         | 3537(82.1)  | 43.5             | 56.5 |         | 4.6                       | 7.2      | 8.5     | 6.2      |         |
| Monthly household income per capital (RMB) |             |                  |      | <0.001  |                           |          |         |          | 0.005   |
| <1000                                      | 1017(23.6)  | 54.2             | 45.8 |         | 5.5                       | 10.1     | 14.4    | 9.9      |         |
| 1000-3999                                  | 2653(61.6)  | 42.2             | 57.8 |         | 4.8                       | 6.5      | 7.4     | 5.4      |         |
| ≥4000                                      | 639(14.8)   | 25.5             | 74.5 |         | 3.4                       | 3.4      | 2.2     | 2.3      |         |
| Physical activity level                    |             |                  |      | <0.001  |                           |          |         |          | <0.001  |
| low                                        | 1431(33.2)  | 38.1             | 61.9 |         | 3.0                       | 7.8      | 7.5     | 5.7      |         |
| medium                                     | 1442(33.5)  | 43.7             | 56.3 |         | 4.8                       | 5.9      | 9.6     | 6.5      |         |
| high                                       | 1436(33.3)  | 45.9             | 54.1 |         | 6.5                       | 7.0      | 7.5     | 5.8      |         |
| Smoking                                    |             |                  |      | 0.006   |                           |          |         |          | <0.001  |

|                                       |             |      |      |       |      |      |      |      |        |
|---------------------------------------|-------------|------|------|-------|------|------|------|------|--------|
| ever/current                          | 1036(24.0)  | 46.2 | 53.8 |       | 7.1  | 8.8  | 8.0  | 4.5  |        |
| never                                 | 3273(76.0)  | 41.4 | 58.6 |       | 4.0  | 6.3  | 8.3  | 6.5  |        |
| Alcohol intake                        |             |      |      | 0.214 |      |      |      |      | <0.001 |
| ever/current                          | 743(17.2)   | 40.5 | 59.5 |       | 7.0  | 7.8  | 6.2  | 2.8  |        |
| never                                 | 3566(82.8)  | 43.0 | 57.0 |       | 4.3  | 6.7  | 8.7  | 6.7  |        |
| Meeting sleep duration recommendation |             |      |      | 0.187 |      |      |      |      | <0.001 |
| yes                                   | 1505(34.9)  | 43.9 | 56.1 |       | 6.5  | 6.9  | 10.9 | 5.4  |        |
| no                                    | 2804(65.1)  | 41.8 | 58.2 |       | 3.8  | 6.9  | 6.8  | 6.3  |        |
| Medical history                       |             |      |      | 0.004 |      |      |      |      | 0.064  |
| yes                                   | 1562(36.3)  | 45.5 | 54.5 |       | 5.2  | 6.5  | 9.9  | 7.2  |        |
| no                                    | 2747(63.8)  | 40.9 | 59.1 |       | 4.5  | 7.1  | 7.3  | 5.4  |        |
| Obesity                               |             |      |      | 0.165 |      |      |      |      | 0.840  |
| yes                                   | 568(13.2)   | 45.2 | 54.8 |       | 4.8  | 6.7  | 9.2  | 6.9  |        |
| no                                    | 3741(86.8)  | 42.2 | 57.8 |       | 4.8  | 6.9  | 8.1  | 5.9  |        |
| central obesity                       |             |      |      | 0.969 |      |      |      |      | 0.822  |
| yes                                   | 2005(46.5)  | 42.6 | 57.4 |       | 4.9  | 6.8  | 7.8  | 5.8  |        |
| no                                    | 2304(53.5)  | 42.5 | 57.5 |       | 4.6  | 6.9  | 8.6  | 6.2  |        |
| Energy (kcal) <sup>c</sup>            | 1522(620.7) | 1484 | 1550 | 0.003 | 1590 | 1489 | 1464 | 1392 | 0.016  |

<sup>a</sup>: CCSNSD= Community-based Cohort Study on Nervous System Diseases, aMCI-SD=amnesic MCI single domain, naMCI-SD=nonamnesic MCI single domain, aMCI-MD=amnesic MCI multiple domains, naMCI-MD=nonamnesic MCI multiple domains. Chi-Square Test was applied for the analysis of categorical variables, Wilcoxon Signed Rank Test or Kruskal-Wallis H Test were employed for the analysis of continuous variables. *P* value < 0.05 was considered to be statistically significant.

<sup>b</sup>: expressed as % (prevalence).

<sup>c</sup>: expressed as mean.

Table S3. Differences in global cognitive score and cognitive domain subscores by characteristics among Chinese adults aged 55 years and above in four provinces in CCSNSD 2018-2019<sup>a</sup>

| Characteristics                            | Global cognitive function | Cognition domain scores |            |           |           |            |           |
|--------------------------------------------|---------------------------|-------------------------|------------|-----------|-----------|------------|-----------|
|                                            |                           | MIS                     | EIS        | VIS       | LIS       | AIS        | OIS       |
| Total                                      | 21.53±6.26                | 11.07±4.23              | 8.69±3.36  | 5.26±1.78 | 4.50±1.42 | 13.16±4.03 | 5.49±0.99 |
| Age group (years)                          |                           |                         |            |           |           |            |           |
| 55-64                                      | 22.85±5.65                | 11.70±3.79              | 9.37±3.06  | 5.63±1.56 | 4.74±1.28 | 13.93±3.71 | 5.65±0.83 |
| 65-74                                      | 21.52±6.11                | 11.04±4.22              | 8.72±3.29  | 5.24±1.76 | 4.50±1.40 | 13.20±3.90 | 5.50±0.96 |
| ≥75                                        | 19.11±6.90                | 9.97±4.76               | 7.39±3.63  | 4.63±2.00 | 4.07±1.59 | 11.66±4.42 | 5.19±1.24 |
| <i>P</i> value                             | <0.001                    | <0.001                  | <0.001     | <0.001    | <0.001    | <0.001     | <0.001    |
| Gender                                     |                           |                         |            |           |           |            |           |
| male                                       | 22.16±5.68                | 11.16±4.09              | 9.13±3.06  | 5.48±1.62 | 4.60±1.34 | 13.48±3.84 | 5.58±0.87 |
| female                                     | 21.00±6.66                | 10.99±4.34              | 8.33±3.54  | 5.08±1.88 | 4.42±1.48 | 12.89±4.16 | 5.42±1.08 |
| <i>P</i> value                             | <0.001                    | 0.790                   | <0.001     | 0.001     | <0.001    | <0.001     | <0.001    |
| Resident area                              |                           |                         |            |           |           |            |           |
| urban                                      | 22.84±5.84                | 11.66±3.86              | 9.36±3.17  | 5.54±1.74 | 4.73±1.33 | 13.93±3.72 | 5.65±0.84 |
| rural                                      | 20.25±6.39                | 10.49±4.48              | 8.05±3.40  | 5.00±1.78 | 4.28±1.47 | 12.41±4.17 | 5.34±1.10 |
| <i>P</i> value                             | <0.001                    | <0.001                  | <0.001     | <0.001    | <0.001    | <0.001     | <0.001    |
| Education level                            |                           |                         |            |           |           |            |           |
| illiteracy                                 | 15.71±6.81                | 8.53±5.20               | 5.49±3.38  | 3.80±2.01 | 3.44±1.53 | 9.58±4.57  | 4.80±1.47 |
| ≤Primary school                            | 20.81±5.95                | 10.84±4.36              | 8.26±3.19  | 4.99±1.75 | 4.37±1.38 | 12.95±3.83 | 5.45±0.98 |
| ≥Secondary school                          | 24.07±4.76                | 12.09±3.27              | 10.13±2.59 | 5.99±1.30 | 4.96±1.20 | 14.50±3.20 | 5.75±0.65 |
| <i>P</i> value                             | <0.001                    | <0.001                  | <0.001     | <0.001    | <0.001    | <0.001     | <0.001    |
| Current employment                         |                           |                         |            |           |           |            |           |
| yes                                        | 22.41±5.95                | 11.42±4.18              | 9.12±3.27  | 5.27±1.88 | 4.74±1.38 | 13.98±3.59 | 5.59±0.86 |
| no                                         | 21.34±6.31                | 10.99±4.24              | 8.60±3.37  | 5.26±1.76 | 4.45±1.42 | 12.98±4.09 | 5.47±1.02 |
| <i>P</i> value                             | <0.001                    | 0.002                   | <0.001     | 0.390     | <0.001    | <0.001     | 0.011     |
| Monthly household income per capital (RMB) |                           |                         |            |           |           |            |           |
| <1000                                      | 18.16±6.17                | 9.60±4.72               | 6.92±3.18  | 4.45±1.92 | 3.93±1.51 | 11.38±4.23 | 5.08±1.29 |
| 1000-3999                                  | 22.05±5.97                | 11.29±4.06              | 8.95±3.24  | 5.41±1.67 | 4.60±1.36 | 13.43±3.88 | 5.59±0.88 |
| ≥4000                                      | 24.75±5.09                | 12.48±3.33              | 10.46±2.82 | 5.95±1.49 | 4.99±1.19 | 14.84±3.20 | 5.74±0.66 |
| <i>P</i> value                             | <0.001                    | <0.001                  | <0.001     | <0.001    | <0.001    | <0.001     | <0.001    |
| Physical activity level                    |                           |                         |            |           |           |            |           |
| low                                        | 21.74±6.41                | 11.33±4.28              | 8.72±3.38  | 5.35±1.70 | 4.42±1.43 | 13.01±4.30 | 5.48±1.02 |
| medium                                     | 21.31±6.38                | 10.86±4.28              | 8.63±3.47  | 5.23±1.83 | 4.48±1.44 | 12.96±4.05 | 5.48±1.02 |
| high                                       | 21.54±5.98                | 11.02±4.11              | 8.74±3.21  | 5.21±1.79 | 4.60±1.39 | 13.51±3.69 | 5.53±0.94 |
| <i>P</i> value                             | 0.162                     | <0.001                  | 0.906      | 0.116     | 0.001     | 0.005      | 0.682     |
| Smoking                                    |                           |                         |            |           |           |            |           |
| ever/current                               | 21.50±5.65                | 10.64±4.30              | 8.87±3.03  | 5.37±1.66 | 4.51±1.36 | 13.17±3.81 | 5.52±0.91 |
| never                                      | 21.54±6.44                | 11.21±4.20              | 8.64±3.45  | 5.23±1.81 | 4.50±1.44 | 13.15±4.09 | 5.49±1.02 |
| <i>P</i> value                             | 0.188                     | <0.001                  | 0.358      | 0.188     | 0.787     | 0.510      | 0.558     |
| Alcohol intake                             |                           |                         |            |           |           |            |           |

|                                       |            |            |           |           |           |            |           |
|---------------------------------------|------------|------------|-----------|-----------|-----------|------------|-----------|
| ever/current                          | 22.59±5.32 | 11.13±4.05 | 9.47±2.83 | 5.61±1.57 | 4.72±1.31 | 13.87±3.54 | 5.61±0.81 |
| never                                 | 21.31±6.42 | 11.06±4.27 | 8.53±3.43 | 5.19±1.81 | 4.45±1.44 | 13.01±4.11 | 5.47±1.03 |
| <i>P</i> value                        | <0.001     | 0.777      | <0.001    | <0.001    | <0.001    | <0.001     | 0.008     |
| Meeting sleep duration recommendation |            |            |           |           |           |            |           |
| yes                                   | 21.81±6.08 | 11.28±4.01 | 8.84±3.28 | 5.32±1.74 | 4.53±1.40 | 13.26±3.93 | 5.54±0.95 |
| no                                    | 21.01±6.56 | 10.68±4.59 | 8.42±3.48 | 5.17±1.84 | 4.44±1.46 | 12.98±4.20 | 5.40±1.06 |
| <i>P</i> value                        | <0.001     | <0.001     | <0.001    | 0.025     | 0.127     | 0.145      | <0.001    |
| Disease history                       |            |            |           |           |           |            |           |
| yes                                   | 20.69±6.48 | 10.61±4.40 | 8.30±3.48 | 5.10±1.84 | 4.37±1.48 | 12.62±4.24 | 5.41±1.07 |
| no                                    | 22.01±6.08 | 11.33±4.11 | 8.92±3.26 | 5.36±1.73 | 4.57±1.38 | 13.47±3.87 | 5.54±0.94 |
| <i>P</i> value                        | <0.001     | <0.001     | <0.001    | <0.001    | <0.001    | <0.001     | <0.001    |
| Obesity                               |            |            |           |           |           |            |           |
| yes                                   | 20.89±6.34 | 10.69±4.38 | 8.41±3.43 | 5.24±1.67 | 4.45±1.35 | 12.68±4.22 | 5.43±1.05 |
| no                                    | 21.63±6.24 | 11.13±4.20 | 8.74±3.34 | 5.27±1.79 | 4.51±1.43 | 13.23±3.99 | 5.50±0.99 |
| <i>P</i> value                        | 0.006      | 0.018      | 0.036     | 0.240     | 0.108     | 0.004      | 0.077     |
| central obesity                       |            |            |           |           |           |            |           |
| yes                                   | 21.54±6.28 | 11.07±4.22 | 8.68±3.39 | 5.30±1.74 | 4.54±1.40 | 13.13±4.11 | 5.50±1.00 |
| no                                    | 21.52±6.24 | 11.07±4.23 | 8.70±3.33 | 5.23±1.81 | 4.46±1.43 | 13.18±3.95 | 5.49±0.99 |
| <i>P</i> value                        | 0.852      | 0.956      | 0.962     | 0.341     | 0.074     | 0.947      | 0.684     |

<sup>a</sup>: CCSNSD= Community-based Cohort Study on Nervous System Diseases, MIS=Memory index score , EIS=Executive index score , VIS=Visuospatial index score , LIS=Language index score , AIS=Attention index score , OIS=Orientation index score. Scores of global cognitive function and domains were expressed as mean±SD, evaluated by Montreal Cognitive Assessment (MoCA, Beijing Version). *P* value < 0.05 was considered to be statistically significant, examined by Wilcoxon Signed Rank Test or Kruskal-Wallis H Test.
